# Supplementary material for: A synergistic strategy established by the combination of two H-enriched B–N based hydrides towards superior dehydrogenation
Source: Royal Society of Chemistry journal article supplement (doi:10.1039/c3ta11599b), 2013-01-01
Supplement: c3ta11599b.pdf [file c3ta11599b.pdf]

# **A synergistic strategy established by the combination of two H-enriched B-N based hydrides towards superior dehydrogenation**

Yingbin Tan,<sup>a, c</sup> Qinfen Gu,<sup>b</sup> Justin A. Kimpton,<sup>b</sup> Qian Li,<sup>c</sup> Xiaowei Chen,<sup>a</sup> Liuzhang  
Ouyang,<sup>d</sup> Min Zhu,<sup>d\*</sup> Dalin Sun<sup>a</sup> and Xuebin Yu<sup>a\*</sup>

<sup>a</sup> *Department of Materials Science, Fudan University, Shanghai 200433, China;*

*Phone and Fax: +86-21-5566 4581. E-mail: yuxuebin@fudan.edu.cn*

<sup>b</sup> *Australian Synchrotron, Clayton, Victoria 3168, Australia;*

<sup>c</sup> *Shanghai Key Laboratory of Modern Metallurgy & Materials Processing, Shanghai  
University, Shanghai 200072, China;*

<sup>d</sup> *School of Materials Science and Engineering South China University of Technology  
Guangzhou, 510641, China  
E-mail: memzhu@scut.edu.cn*

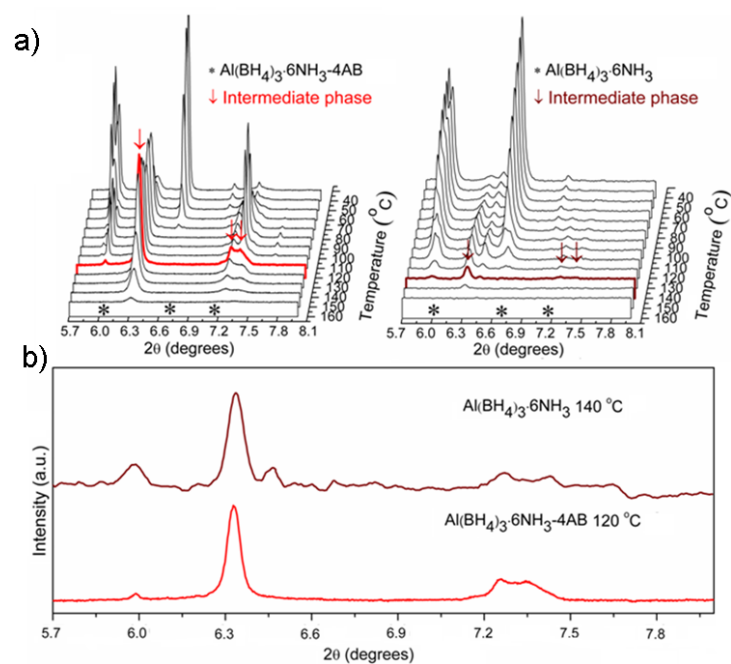

**Fig. S1** a) Selected parts of the in-situ XRD patterns for  $\text{Al}(\text{BH}_4)_3 \cdot 6\text{NH}_3 \cdot 4\text{AB}$  and  $\text{Al}(\text{BH}_4)_3 \cdot 6\text{NH}_3$ ; b) XRD patterns for  $\text{Al}(\text{BH}_4)_3 \cdot 6\text{NH}_3 \cdot 4\text{AB}$  and  $\text{Al}(\text{BH}_4)_3 \cdot 6\text{NH}_3$  at 120 °C and 140 °C, respectively. The data is collected at a wavelength of 0.688702 Å.

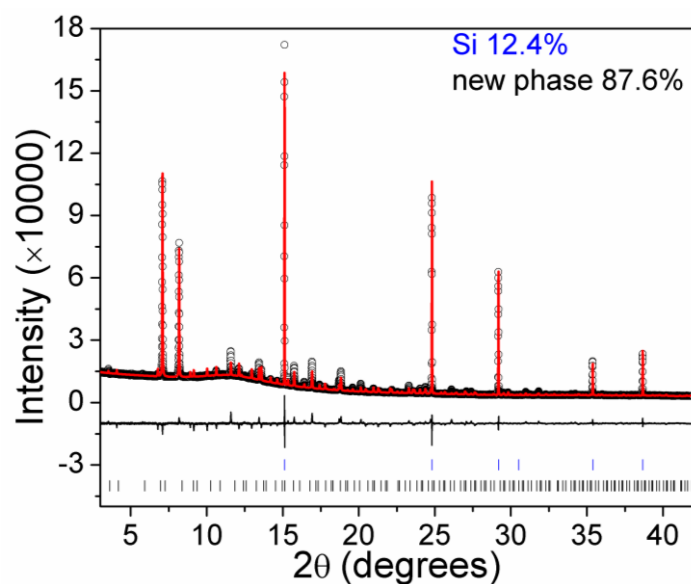

**Fig. S2** Rietveld refinement profile for as-prepared  $\text{Li}_2\text{Al}(\text{BH}_4)_5(\text{NH}_3\text{BH}_3)_3 \cdot 6\text{NH}_3$  sample with Si (spiked 10 wt.%) as internal reference showing observed (black circles), calculated (red line), and difference (black line) plots. The positions of Bragg reflections (tick marks) are shown for  $\text{Li}_2\text{Al}(\text{BH}_4)_5(\text{NH}_3\text{BH}_3)_3 \cdot 6\text{NH}_3$  (black) and Si (blue). The refined proportions of  $\text{Li}_2\text{Al}(\text{BH}_4)_5(\text{NH}_3\text{BH}_3)_3 \cdot 6\text{NH}_3$  and Si were 87.6 wt. % and 12.4 wt. %, respectively. The data is collected at a wavelength of  $0.8250 \text{ \AA}$ .

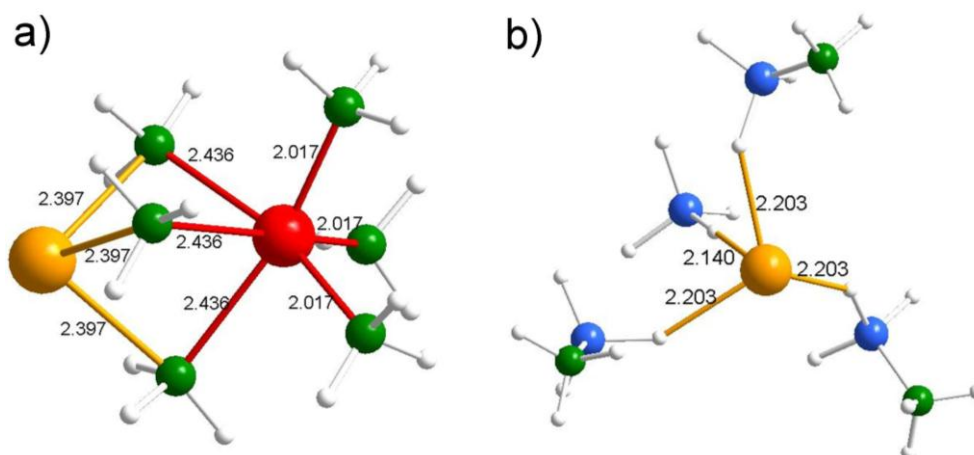

**Fig. S3** Illustrations of the  $\text{Li}_2\text{Al}(\text{BH}_4)_5(\text{NH}_3\text{BH}_3)_3 \cdot 6\text{NH}_3$  structure.

In  $\text{Li}_2\text{Al}(\text{BH}_4)_5(\text{NH}_3\text{BH}_3)_3 \cdot 6\text{NH}_3$  structure, one Li atom connects to three  $\text{NH}_3$  molecules with a Li-N distance of 2.397 Å, which induces extend the distance of Al-N *via* the Li-N bonds, and Al atoms centered distorted octahedron coordinated exclusively by six  $\text{NH}_3$  molecules with a Al-N distance of 2.017 Å and 2.436 Å. Another Li atom is tetrahedrally coordinated with three AB and one  $\text{BH}_4^-$  units *via* Li-H ionic bonds. The distances between the Li and the nearby hydridic  $\text{H}^-$  are 2.141 Å and 2.203 Å, comparable to those between Li and H in the  $\text{LiBH}_4$  (2.023-2.246 Å).

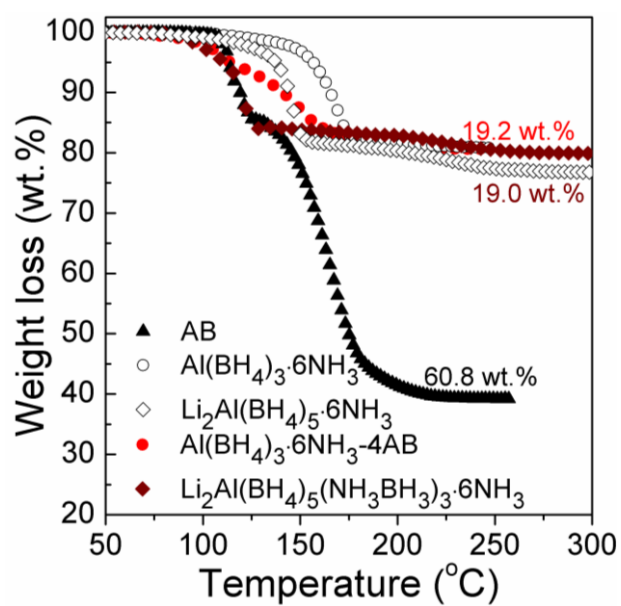

**Fig. S4** TG results for neat AB,  $\text{Al}(\text{BH}_4)_3 \cdot 6\text{NH}_3$ ,  $\text{Li}_2\text{Al}(\text{BH}_4)_5 \cdot 6\text{NH}_3$ ,  $\text{Al}(\text{BH}_4)_3 \cdot 6\text{NH}_3 - 4\text{AB}$  and  $\text{Li}_2\text{Al}(\text{BH}_4)_5 \cdot 6\text{NH}_3 - 3\text{AB}$ .

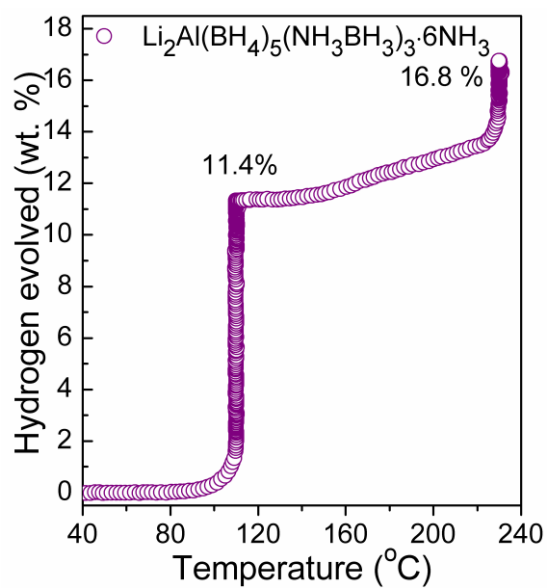

**Fig. S5** (a) TPD result for  $\text{Li}_2\text{Al}(\text{BH}_4)_5 \cdot 6\text{NH}_3 \cdot 3\text{AB}$  with a heating rate of  $5\text{ }^\circ\text{C} \cdot \text{min}^{-1}$ . For TPD measurement, the sample was hold at 110 and 230  $^\circ\text{C}$  for 180 min, respectively, during heating.

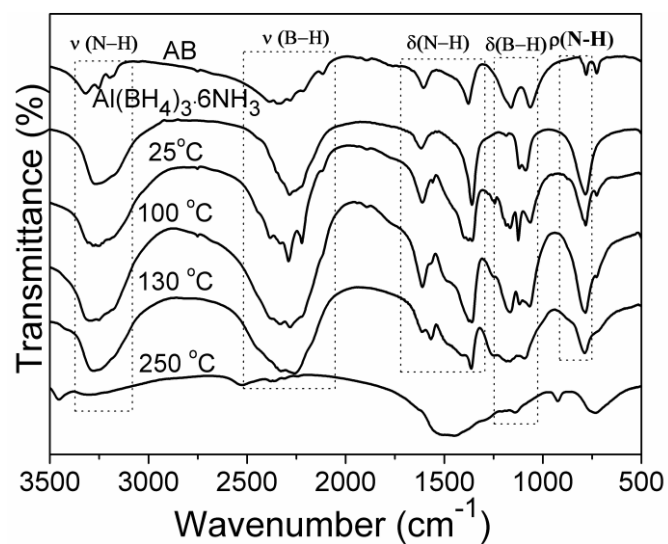

**Fig. S6** FTIR spectra for  $\text{Al}(\text{BH}_4)_3 \cdot 6\text{NH}_3$ -4AB at 25 °C and its products after heating to 100 °C, 130 °C and 250 °C. Neat AB and  $\text{Al}(\text{BH}_4)_3 \cdot 6\text{NH}_3$  were also measured for comparison.

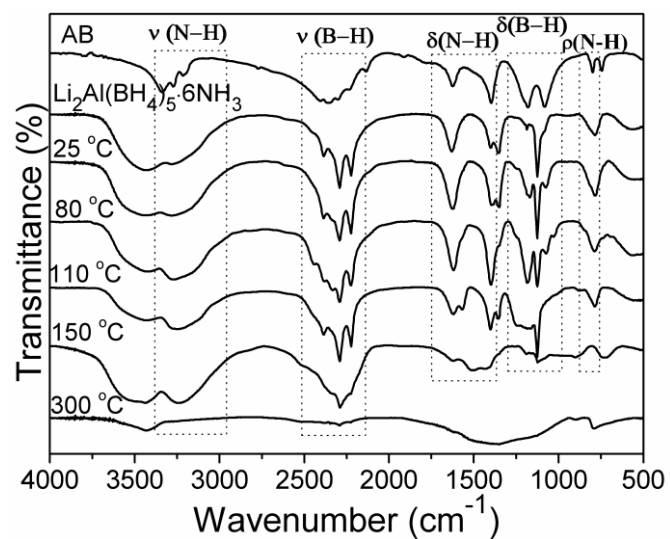

**Fig. S7** FTIR spectra for Li<sub>2</sub>Al(BH<sub>4</sub>)<sub>5</sub>·6NH<sub>3</sub>-3AB at 25 °C and its products after heating to 80 °C, 110 °C, 150 °C and 300 °C. Neat AB and Li<sub>2</sub>Al(BH<sub>4</sub>)<sub>5</sub>·6NH<sub>3</sub> were also measured for comparison.



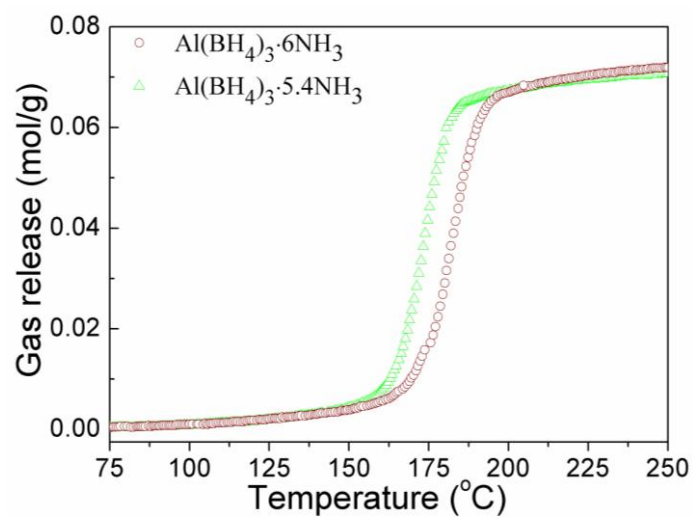

**Fig. S8** TPD results of hydrogen release from Al(BH<sub>4</sub>)<sub>3</sub>·6NH<sub>3</sub> and Al(BH<sub>4</sub>)<sub>3</sub>·5.4NH<sub>3</sub> with a heating rate of 5 °C min<sup>-1</sup>.

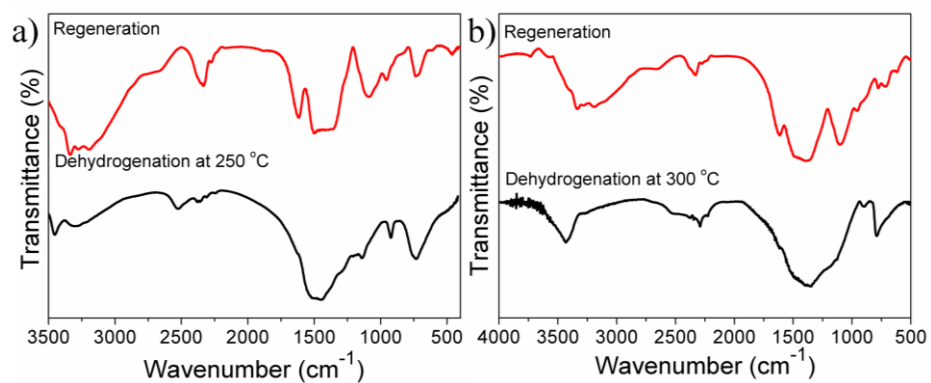

**Fig. S9** FTIR spectra for dehydrogenated and regenerated a)  $\text{Al}(\text{BH}_4)_5 \cdot 6\text{NH}_3 \cdot 4\text{AB}$  and  
b)  $\text{Li}_2\text{Al}(\text{BH}_4)_5(\text{NH}_3\text{BH}_3)_3 \cdot 6\text{NH}_3$ .

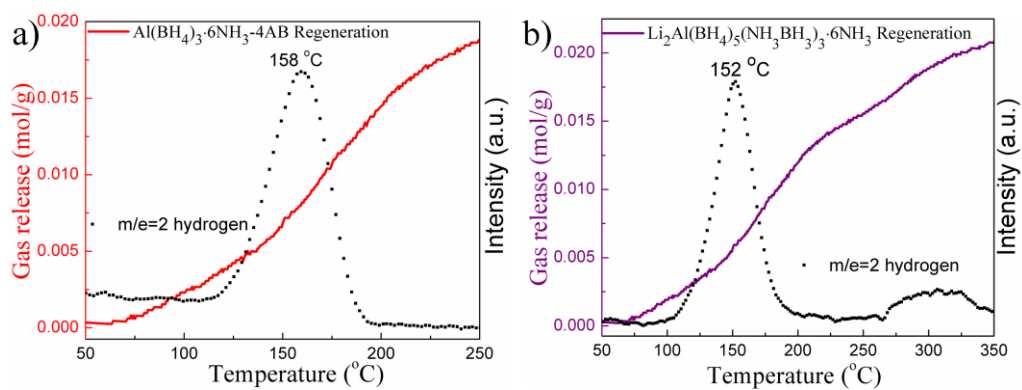

**Fig. S10** TPD/MS profiles for a)  $\text{Al}(\text{BH}_4)_3 \cdot 6\text{NH}_3 \cdot 4\text{AB}$  and  $\text{Li}_2\text{Al}(\text{BH}_4)_5(\text{NH}_3\text{BH}_3)_3 \cdot 6\text{NH}_3$ , with a heating rate of  $5\text{ }^\circ\text{C min}^{-1}$  in nitrogen.

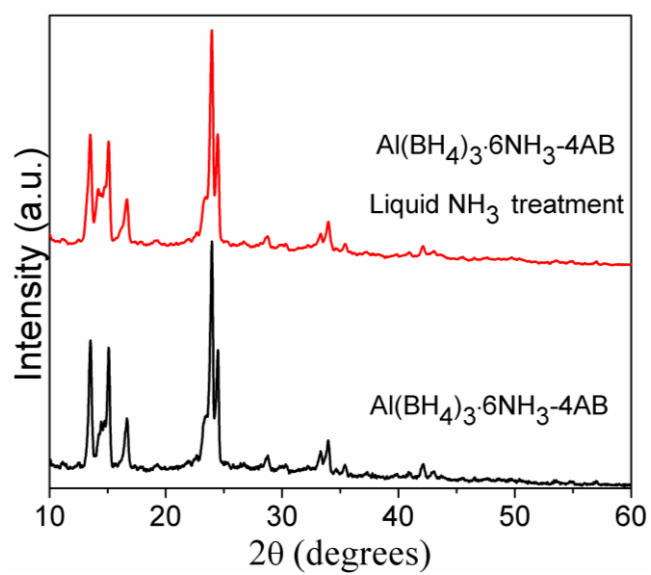

**Fig. S11** XRD patterns of  $\text{Al}(\text{BH}_4)_3 \cdot 6\text{NH}_3 \cdot 4\text{AB}$  and  $\text{Al}(\text{BH}_4)_3 \cdot 6\text{NH}_3 \cdot 4\text{AB}$  after treatment with ammonia. The data is collected at a wavelength of  $1.5406 \text{ \AA}$ .

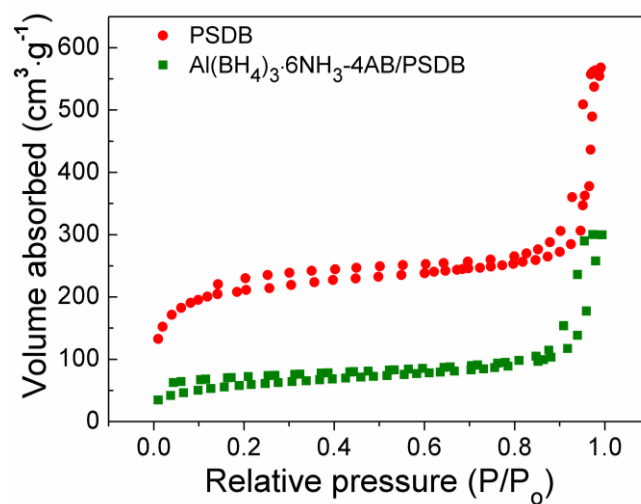

**Fig. S12** Pore size distributions for PSDB and PSDB-confined Al(BH<sub>4</sub>)<sub>3</sub>·6NH<sub>3</sub>-4AB. The inset shows the corresponding N<sub>2</sub> absorption-desorption isotherms at 77 K.

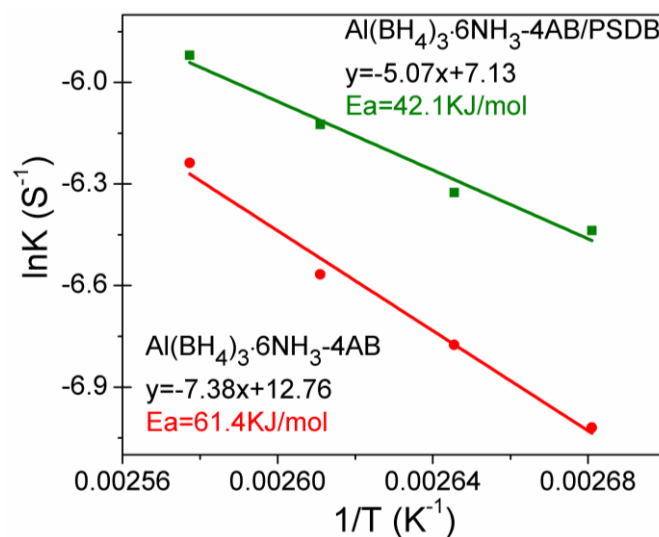

**Fig. S13** Arrhenius treatment of the temperature-dependent rate data giving the activation energy of Al(BH<sub>4</sub>)<sub>3</sub>·6NH<sub>3</sub>-4AB and Al(BH<sub>4</sub>)<sub>3</sub>·6NH<sub>3</sub>-4AB/PSDB.

**Table S1** Experimental and calculated structural parameters of  $\text{Li}_2\text{Al}(\text{BH}_4)_5(\text{NH}_3\text{BH}_3)_3 \cdot 6\text{NH}_3$  (space group F23, no. 196,  $a = b = c = 23.1220(3) \text{ \AA}$ )

| Atom | site | x        |          | y        |          | z        |          |
|------|------|----------|----------|----------|----------|----------|----------|
|      |      | Exp.     | Cal.     | Exp.     | Cal.     | Exp.     | Cal.     |
| B11  | 48h  | 0.25727  | 0.25727  | 0.11806  | 0.11806  | 0.32779  | 0.32779  |
| H11a | 48h  | 0.23545  | 0.23543  | 0.07065  | 0.06930  | 0.32133  | 0.32023  |
| H11b | 48h  | 0.23170  | 0.23173  | 0.15244  | 0.15076  | 0.35685  | 0.36084  |
| H11c | 48h  | 0.30980  | 0.31103  | 0.11817  | 0.11771  | 0.32598  | 0.32559  |
| H11d | 48h  | 0.25481  | 0.25513  | 0.14043  | 0.14383  | 0.27017  | 0.27209  |
| H12a | 48h  | 0.35608  | 0.35518  | 0.36740  | 0.36760  | 0.42381  | 0.42484  |
| H13a | 48h  | -0.19460 | -0.19539 | -0.12869 | -0.12681 | -0.13843 | -0.14019 |
| N21  | 48h  | -0.32157 | -0.32157 | -0.09793 | -0.09793 | 0.79711  | 0.79711  |
| H21a | 48h  | -0.32125 | -0.31995 | -0.05295 | -0.05189 | 0.79767  | 0.79749  |
| H21b | 48h  | -0.27827 | -0.27762 | -0.11050 | -0.11213 | 0.79847  | 0.79826  |
| H21c | 48h  | -0.33744 | -0.33808 | -0.11052 | -0.11065 | 0.75619  | 0.75526  |
| N22  | 48h  | -0.07724 | -0.07724 | 0.65524  | 0.65524  | -0.04536 | -0.04536 |
| H22a | 48h  | -0.03255 | -0.03156 | 0.65202  | 0.65202  | -0.04964 | -0.05004 |
| H22b | 48h  | -0.08288 | -0.08278 | 0.69949  | 0.70059  | -0.03727 | -0.03659 |
| H22c | 48h  | -0.08886 | -0.08908 | 0.63754  | 0.63712  | -0.00505 | -0.00405 |
| B1   | 48h  | 0.31729  | 0.31729  | 0.48686  | 0.48686  | -0.91647 | -0.91647 |
| H1a  | 48h  | 0.32047  | 0.32056  | 0.49501  | 0.49616  | -0.86481 | -0.86378 |
| H1b  | 48h  | 0.35294  | 0.35313  | 0.51782  | 0.51911  | -0.94222 | -0.94304 |
| H1c  | 48h  | 0.26889  | 0.26769  | 0.49779  | 0.49862  | -0.93516 | -0.93538 |
| N2   | 48h  | 0.33377  | 0.33377  | 0.42164  | 0.42164  | -0.93088 | -0.93088 |
| H2a  | 48h  | 0.32468  | 0.32458  | 0.39501  | 0.39434  | -0.89482 | -0.89370 |
| H2b  | 48h  | 0.30889  | 0.30809  | 0.40512  | 0.40428  | -0.96407 | -0.96445 |
| H2c  | 48h  | 0.37557  | 0.37626  | 0.41675  | 0.41666  | -0.94568 | -0.94675 |
| Li1  | 16e  | 0.94292  | 0.94292  | 0.94292  | 0.94292  | 0.94292  | 0.94292  |

|      |     |          |          |          |          |          |          |
|------|-----|----------|----------|----------|----------|----------|----------|
| Li2  | 16e | 0.55237  | 0.55237  | 0.55237  | 0.55237  | 0.55237  | 0.55237  |
| Al1  | 16e | 0.63435  | 0.63435  | 0.63435  | 0.63435  | 0.63435  | 0.63435  |
| B12  | 16e | 0.39021  | 0.39021  | 0.39021  | 0.39021  | 0.39021  | 0.39021  |
| H12b | 16e | 0.42302  | 0.42397  | 0.42302  | 0.42397  | 0.42302  | 0.42397  |
| B13  | 16e | -0.14265 | -0.14265 | -0.14265 | -0.14265 | -0.14265 | -0.14265 |
| H13b | 16e | -0.11233 | -0.11175 | -0.11233 | -0.11175 | -0.11233 | -0.11175 |



**Table S2** Purity of hydrogen released in all the samples.

| Samples                                                                  | Wt % H <sub>2</sub> capacity | mol % H <sub>2</sub> | Mol H <sub>2</sub> |
|--------------------------------------------------------------------------|------------------------------|----------------------|--------------------|
| Al(BH <sub>4</sub> ) <sub>3</sub> ·6NH <sub>3</sub>                      | 13.3                         | 93.7                 | 11.5               |
| Al(BH <sub>4</sub> ) <sub>3</sub> ·6NH <sub>3</sub> -AB                  | 13.8                         | 96.4                 | 14.1               |
| Al(BH <sub>4</sub> ) <sub>3</sub> ·6NH <sub>3</sub> -2AB                 | 14.2                         | 97.3                 | 16.6               |
| Al(BH <sub>4</sub> ) <sub>3</sub> ·6NH <sub>3</sub> -3AB                 | 14.4                         | 98.1                 | 19.0               |
| Al(BH <sub>4</sub> ) <sub>3</sub> ·6NH <sub>3</sub> -4AB                 | 14.5                         | 98.3                 | 21.3               |
| Al(BH <sub>4</sub> ) <sub>3</sub> ·6NH <sub>3</sub> -5AB                 | 14.7                         | 98                   | 23.9               |
| Al(BH <sub>4</sub> ) <sub>3</sub> ·6NH <sub>3</sub> -6AB                 | 14.8                         | 97.8                 | 26.4               |
| Li <sub>2</sub> Al(BH <sub>4</sub> ) <sub>5</sub> ·6NH <sub>3</sub>      | 15.1                         | 94.3                 | 16.2               |
| Li <sub>2</sub> Al(BH <sub>4</sub> ) <sub>5</sub> ·6NH <sub>3</sub> -AB  | 16.5                         | 97.6                 | 20.2               |
| Li <sub>2</sub> Al(BH <sub>4</sub> ) <sub>5</sub> ·6NH <sub>3</sub> -2AB | 16.6                         | 98.0                 | 23.0               |
| Li <sub>2</sub> Al(BH <sub>4</sub> ) <sub>5</sub> ·6NH <sub>3</sub> -3AB | 16.9                         | 98.6                 | 26.0               |
| Li <sub>2</sub> Al(BH <sub>4</sub> ) <sub>5</sub> ·6NH <sub>3</sub> -4AB | 16.8                         | 97.1                 | 28.3               |
| Li <sub>2</sub> Al(BH <sub>4</sub> ) <sub>5</sub> ·6NH <sub>3</sub> -5AB | 16.6                         | 96.9                 | 30.5               |
| Li <sub>2</sub> Al(BH <sub>4</sub> ) <sub>5</sub> ·6NH <sub>3</sub> -6AB | 16.4                         | 95.0                 | 32.7               |
